# Supplementary material for: Basicity and coordination properties of a new phenanthroline-based bis-macrocyclic receptor
Source: Royal Society of Chemistry journal article supplement (doi:10.1039/b603505a), 2006-01-01
Supplement: b603505a.pdf [file b603505a.pdf]

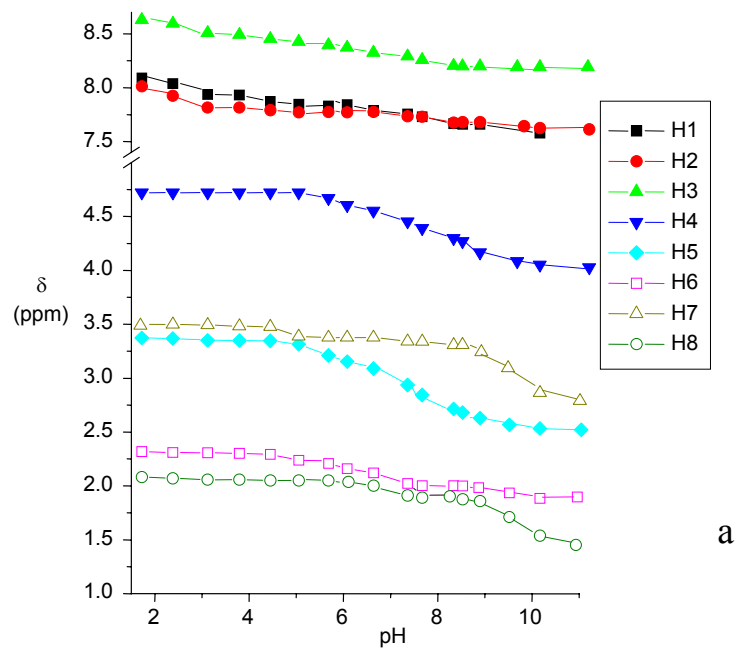

a

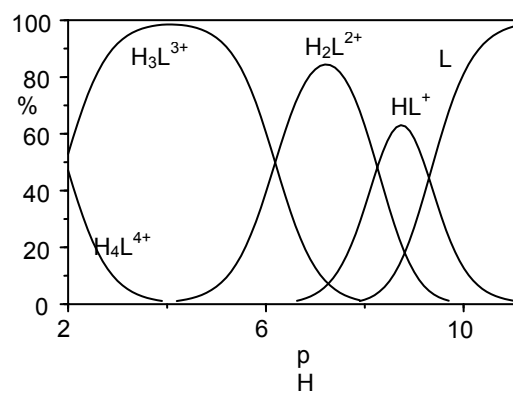

b

**Figure S1.** pH dependence of the  $^1\text{H}$  NMR signals of L1 (a) and distribution diagram of the L1 protonated species (b)

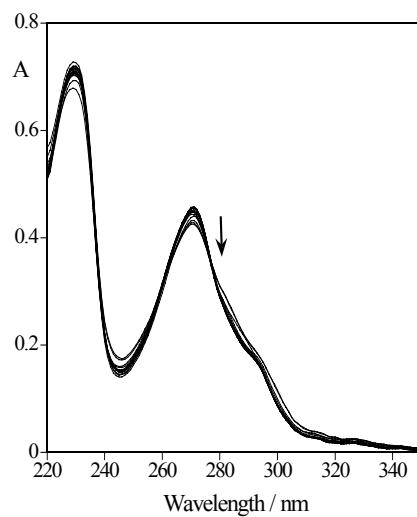

**Fig. S2.** pH dependence of the absorption spectra of L1 aqueous solution. ( $[L1] = 1.30 \cdot 10^{-5} \text{ M}$  I = 0.1 M  $\text{NMe}_4\text{Cl}$ , 298 K). (pH = 1.16; 1.51; 1.73; 2.07; 2.28; 2.50; 2.76; 3.07; 3.60; 4.05; 4.72; 5.30; 6.00; 6.22; 6.39; 6.77; 7.30; 8.25; 9.11; 10.78; 11.30).
